# Supplementary material for: Adsorption and Corrosion Inhibition Studies of Some Selected Dyes as Corrosion Inhibitors for Mild Steel in Acidic Medium: Gravimetric, Electrochemical, Quantum Chemical Studies and Synergistic Effect with Iodide Ions
Source: PubMed Central journal article supplement (PMC6331870; doi:10.3390/molecules200916004), 2015-09-02
Supplement: molecules-20-16004-s001.pdf [file molecules-20-16004-s001.pdf]

# Supplementary Materials

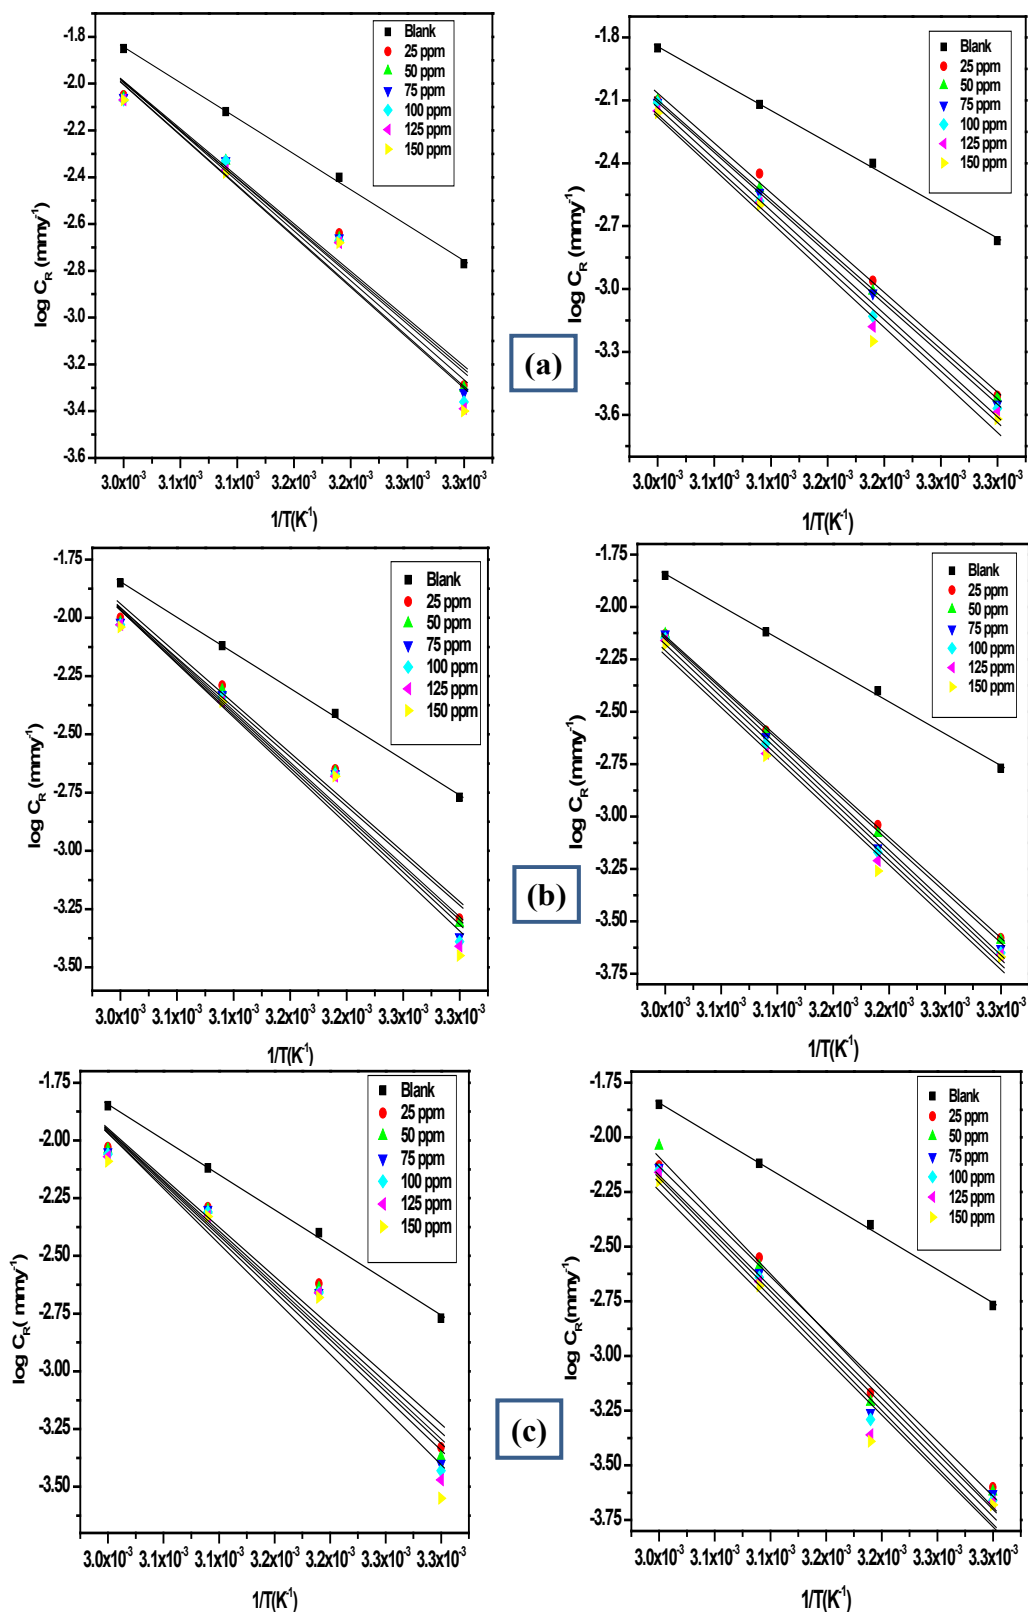

Figure S1. Cont.

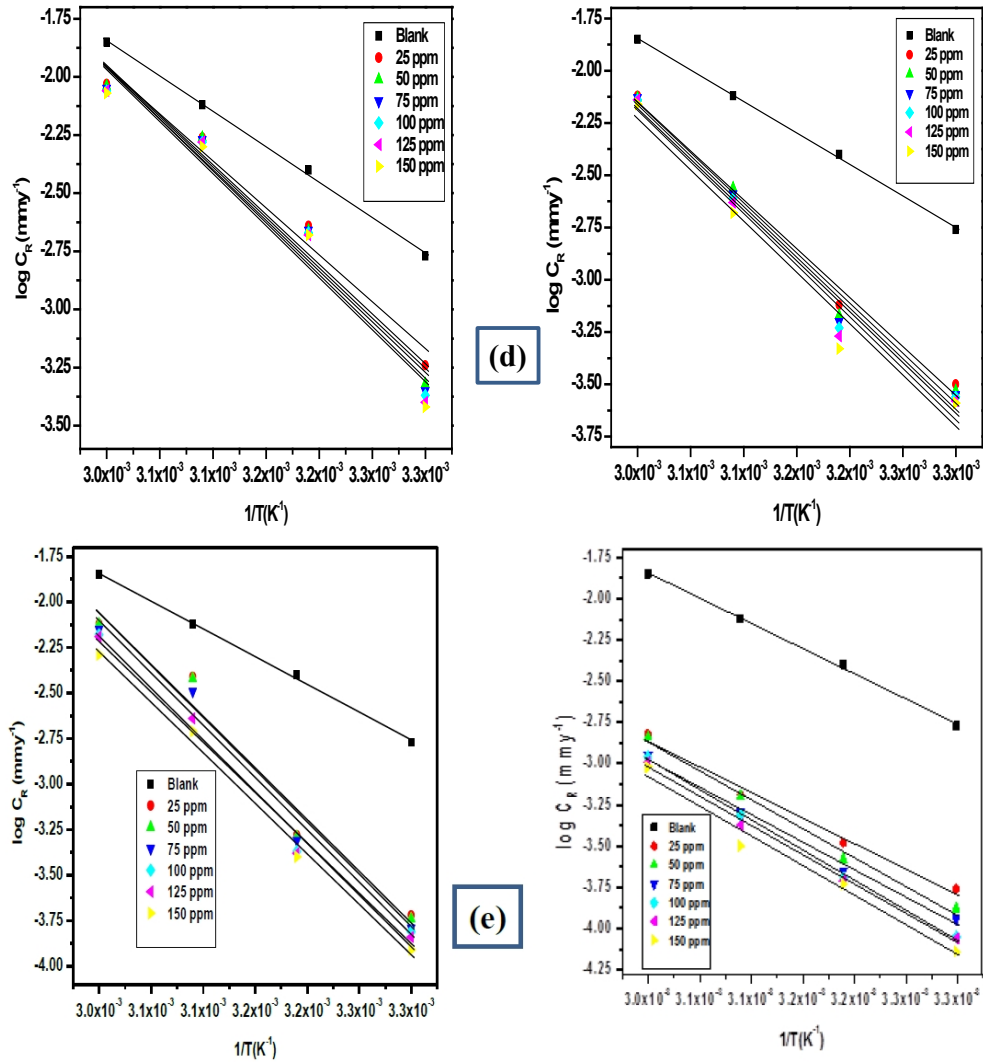

**Figure S1.** Arrhenius plots ( $\log CR$  vs.  $1/T$ ) for mild steel corrosion in 0.5 M HCl in the absence and presence of different concentrations of (a) SS; (b) AM; (c) AR; (d) TZ; and (e) FG; without KI (**left-hand side**) and with KI (**right-hand side**).

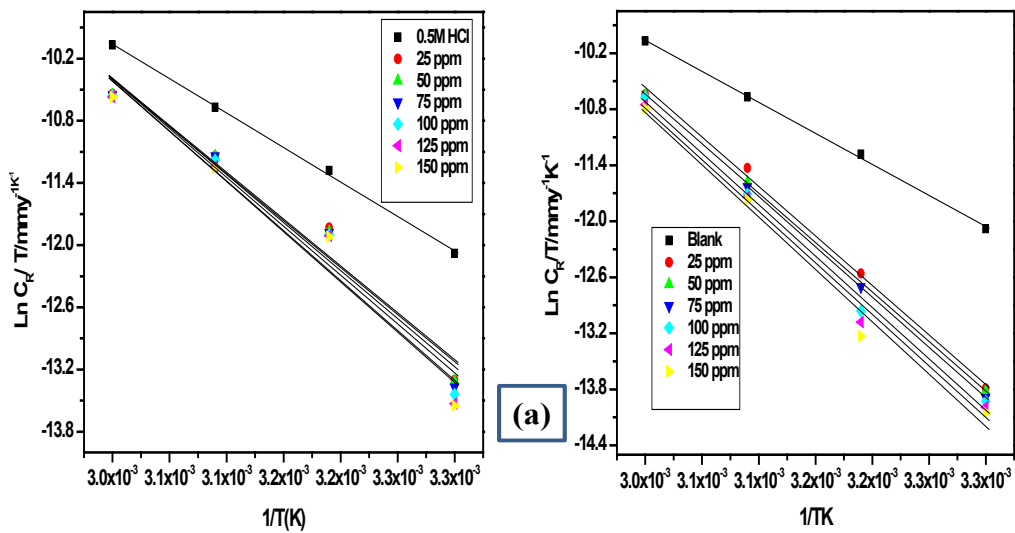

**Figure S2.** *Cont.*

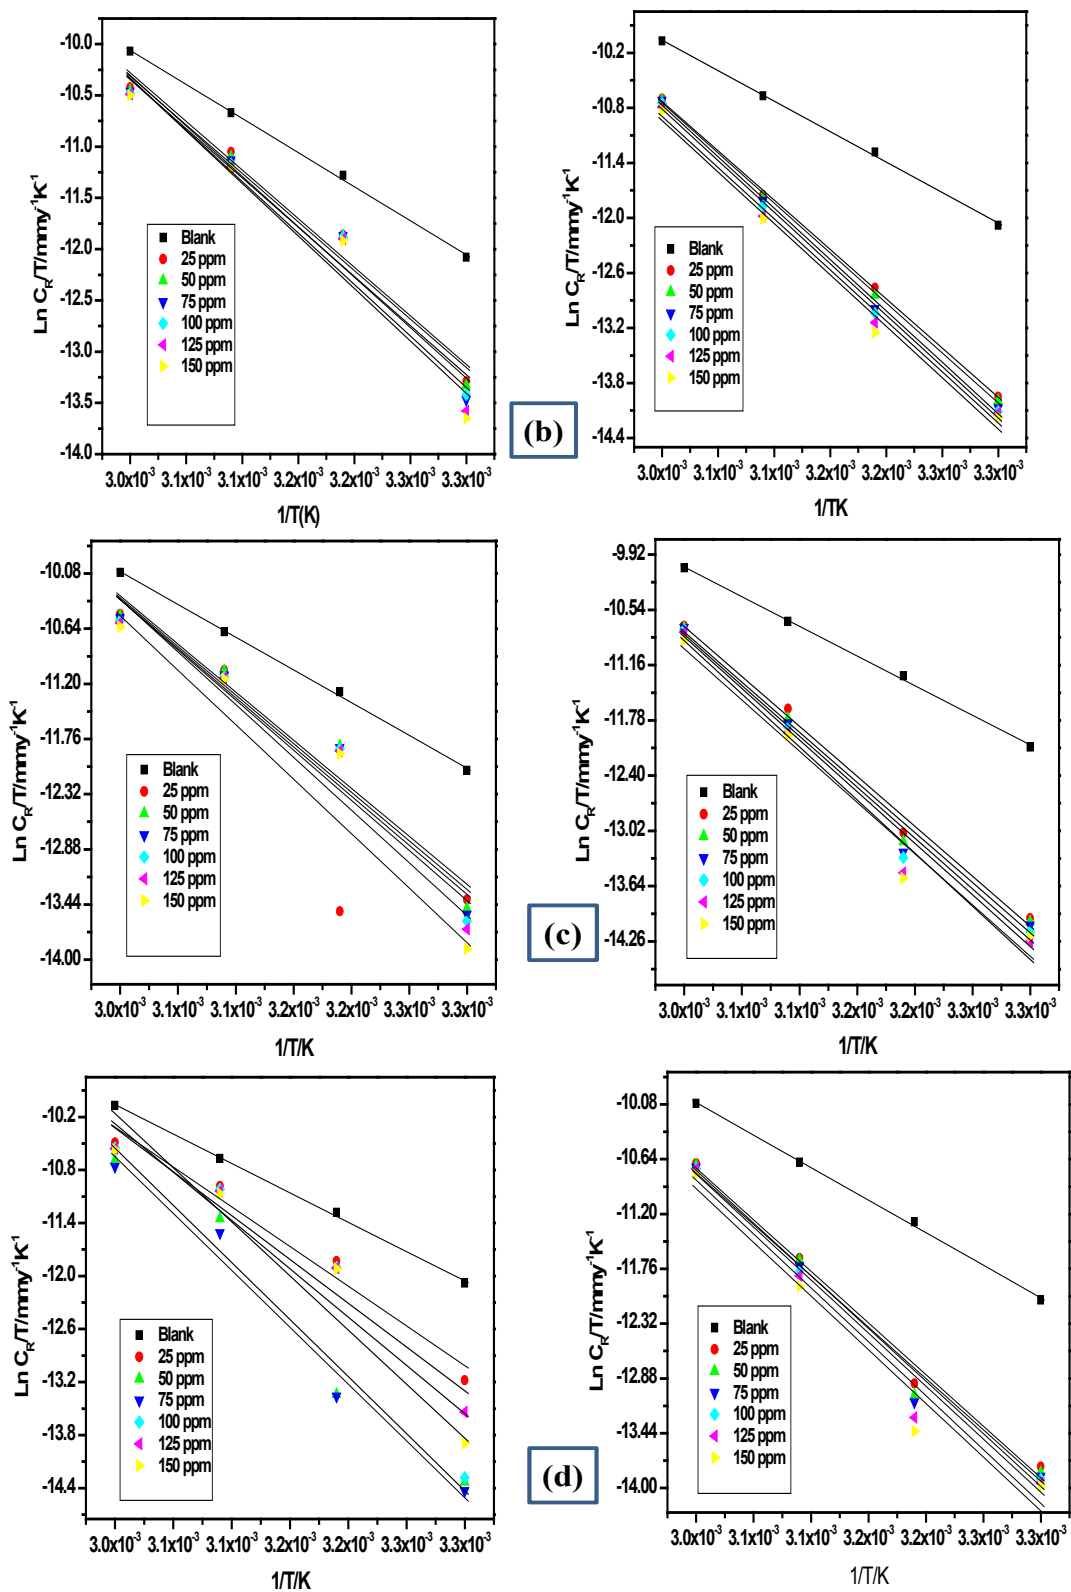

Figure S2. Cont.

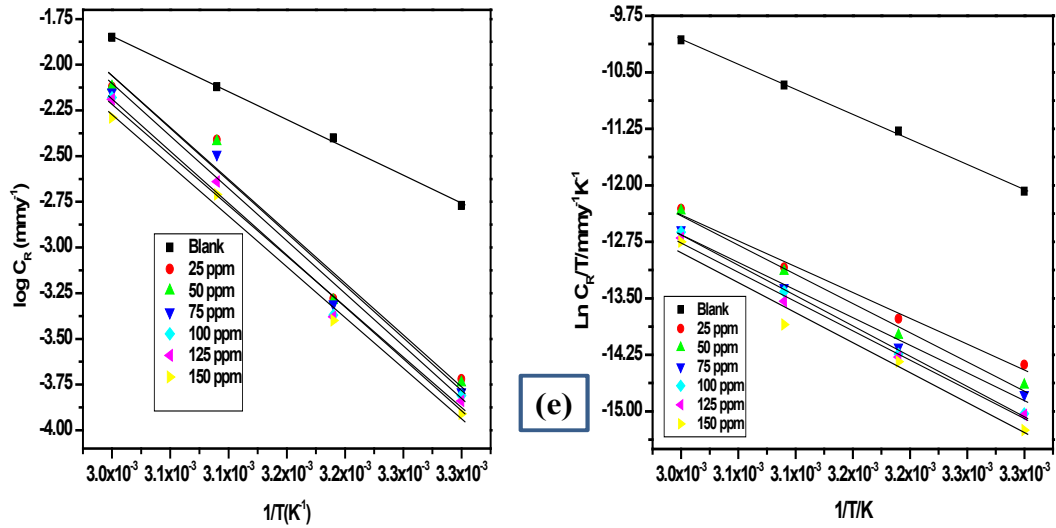

**Figures S2.** The transition state plots ( $\log C_R/T$  vs.  $1/T$ ) for mild steel corrosion in 0.5 M HCl in the absence and presence of different concentrations of (a) SS; (b) AM; (c) AR; (d) TZ; and (e) FG; without KI (left hand side) and with KI (right hand side).

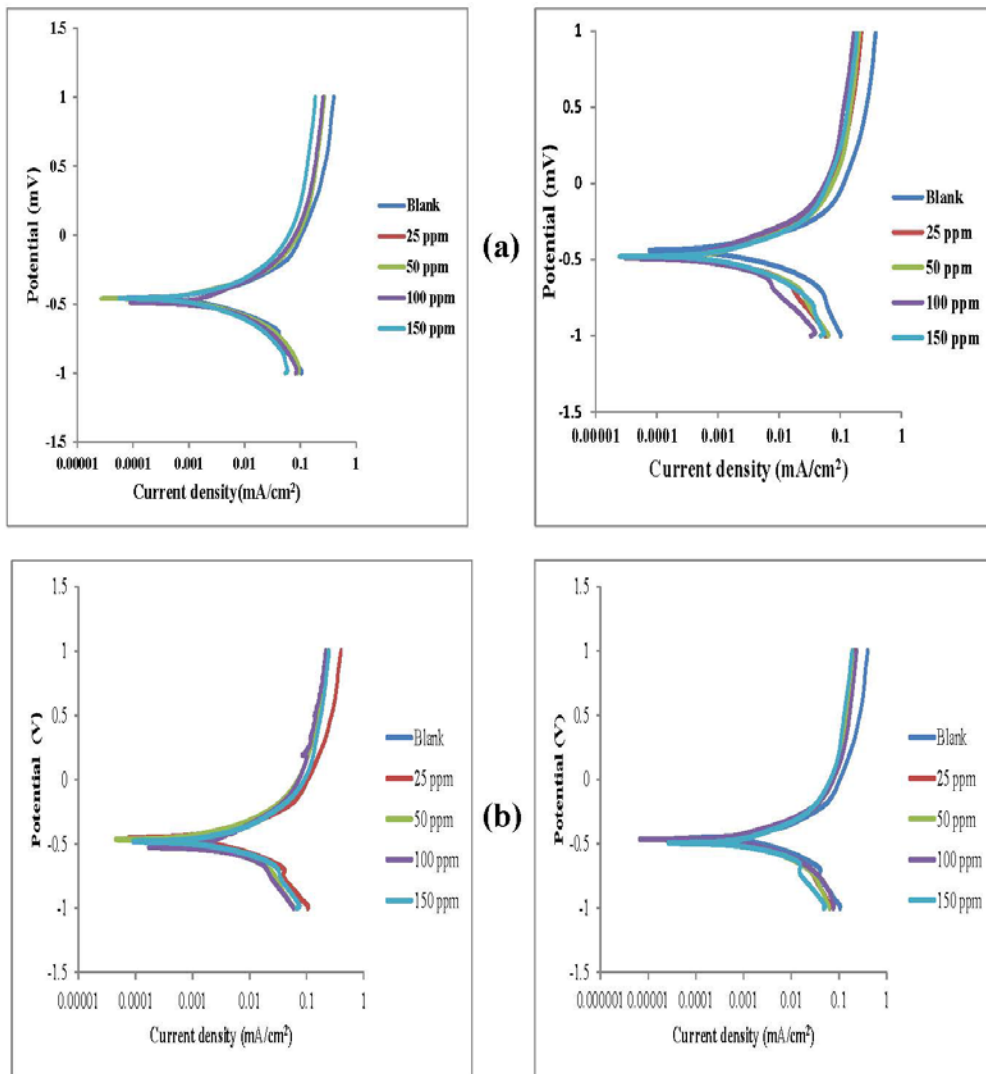

**Figure S3.** Cont.

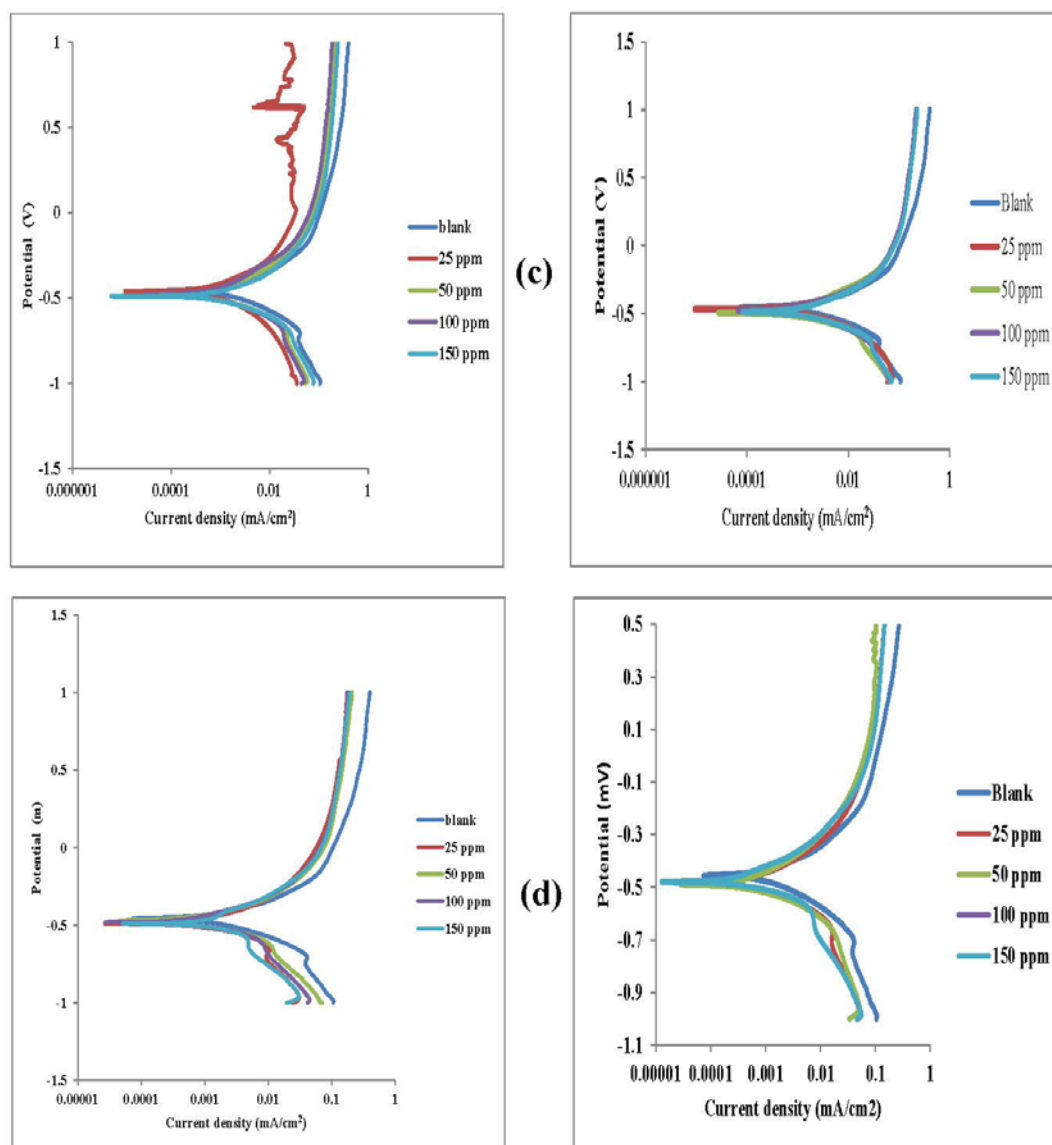

**Figure S3.** Potentiodynamic polarization curves for mild corrosion in 0.5 M HCl without and with various concentrations of (a) AM; (b) AR; (c) TT; and (d) FG; without KI (left-hand side) and with KI (right-hand side).

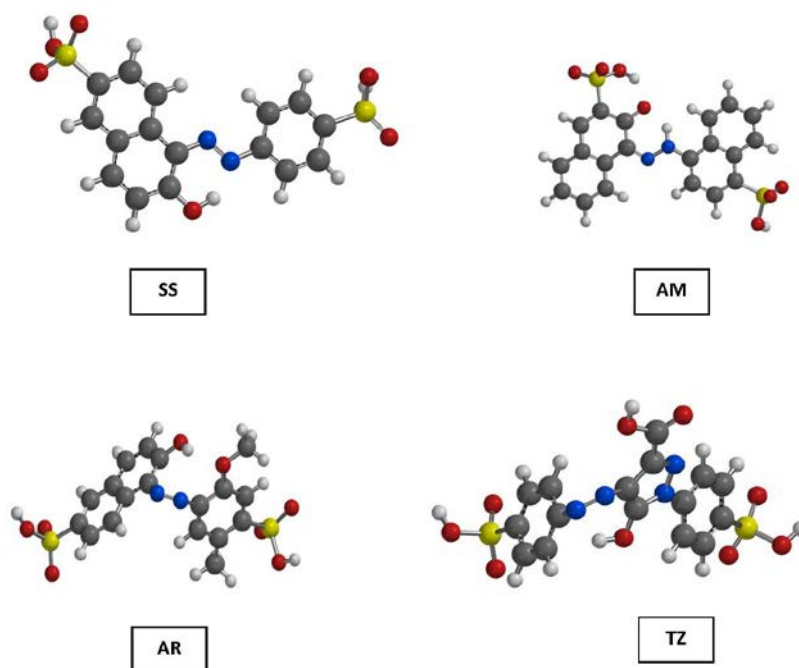

**Figure S4.** Optimized molecular structures of the studied dyes. Only the lowest energy conformer of each structure is shown. The blue colour represents the N atoms, the red colour represent O atoms, the grey colour represents C atoms, the yellow colour represents S atoms and the white color represent H atoms.

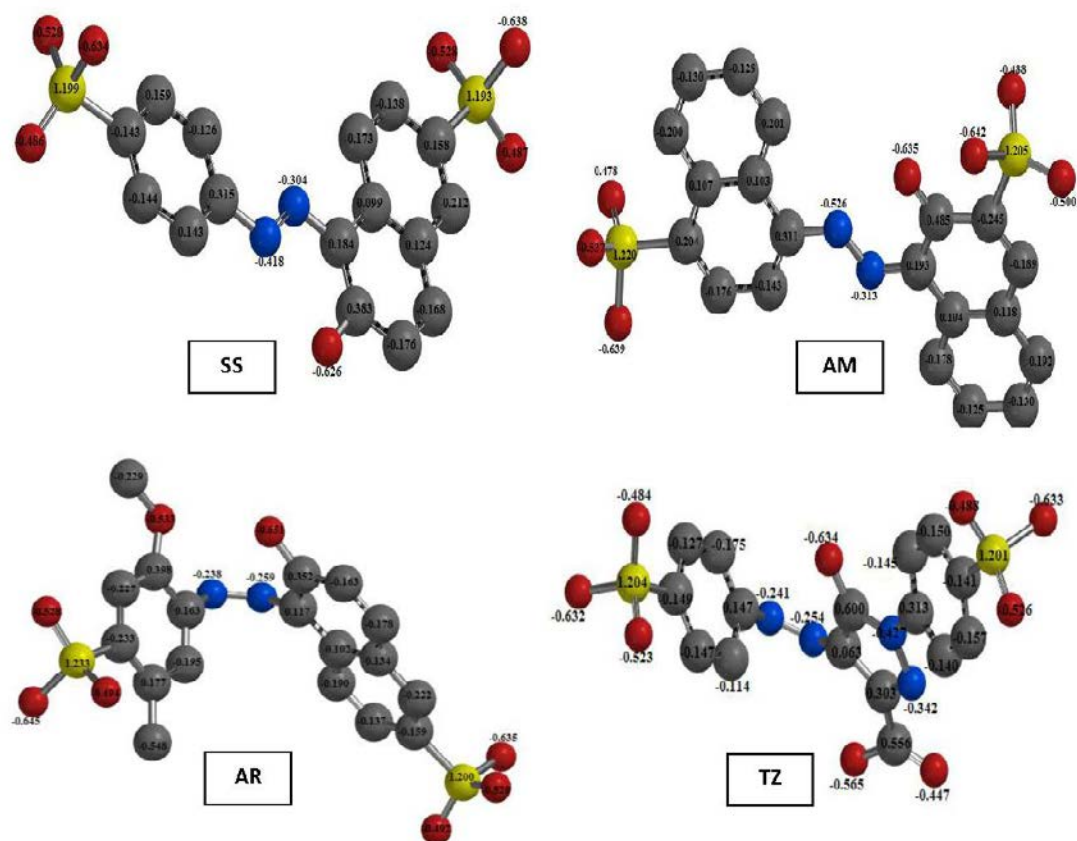

**Figure S5.** Mulliken atomic charges for the studied dyes.

**Table S1.** The estimated Fukui indices for the studied food dyes.

| SS    |        |        | AM    |        |        | AR    |        |        | TZ    |        |        |
|-------|--------|--------|-------|--------|--------|-------|--------|--------|-------|--------|--------|
| Atoms | $f^+$  | $f^-$  | Atoms | $f^+$  | $f^-$  | Atoms | $f^+$  | $f^-$  | Atoms | $f^+$  | $f^-$  |
| O1    | -0.019 | -0.027 | O1    | -0.027 | -0.023 | O1    | -0.025 | -0.022 | O1    | -0.029 | -0.023 |
| S2    | -0.022 | -0.025 | S2    | -0.027 | -0.028 | S2    | -0.036 | -0.021 | S2    | -0.040 | -0.020 |
| O3    | -0.003 | -0.007 | O3    | -0.019 | -0.015 | O3    | -0.022 | -0.022 | O3    | -0.027 | -0.020 |
| O4    | -0.017 | -0.027 | O4    | -0.024 | -0.017 | O4    | -0.009 | -0.010 | O4    | -0.011 | -0.012 |
| C5    | -0.009 | -0.026 | C5    | 0.020  | -0.007 | C5    | -0.025 | -0.022 | C5    | -0.028 | -0.020 |
| C6    | -0.019 | -0.017 | C6    | -0.047 | -0.017 | C6    | -0.001 | 0.000  | C6    | -0.014 | -0.007 |
| C7    | -0.003 | -0.033 | C7    | -0.015 | -0.045 | C7    | 0.005  | 0.004  | C7    | -0.015 | -0.012 |
| C8    | -0.023 | 0.004  | C8    | -0.019 | 0.003  | C8    | -0.018 | -0.010 | C8    | -0.001 | 0.271  |
| C9    | 0.012  | -0.001 | C9    | 0.013  | -0.005 | C9    | 0.017  | 0.021  | C9    | -0.017 | -0.016 |
| C10   | -0.016 | -0.023 | C10   | -0.050 | -0.020 | C10   | -0.033 | -0.027 | C10   | -0.011 | -0.007 |
| C11   | -0.042 | -0.031 | O11   | -0.060 | -0.035 | C11   | -0.011 | -0.445 | N11   | -0.098 | -0.100 |
| C12   | -0.006 | -0.011 | C12   | -0.012 | -0.015 | O12   | 0.008  | -0.011 | O12   | -0.032 | -0.028 |
| C13   | -0.043 | -0.029 | C13   | -0.011 | -0.023 | C13   | 0.022  | 0.024  | N13   | -0.114 | -0.078 |
| C14   | -0.001 | -0.064 | C14   | -0.015 | -0.004 | N14   | -0.116 | -0.075 | C14   | 0.035  | -0.036 |
| O15   | -0.045 | -0.059 | C15   | -0.008 | -0.026 | N15   | -0.111 | -0.055 | C15   | -0.057 | -0.042 |
| N16   | -0.080 | -0.007 | N16   | -0.075 | 0.002  | O16   | -0.031 | -0.050 | N16   | 0.004  | -0.011 |
| N17   | -0.053 | -0.036 | N17   | -0.019 | -0.033 | C17   | -0.679 | -0.030 | N17   | -0.043 | -0.048 |
| C18   | -0.002 | -0.002 | C18   | 0.001  | -0.016 | C18   | -0.008 | -0.006 | C18   | -0.031 | -0.029 |
| C19   | -0.015 | -0.021 | C19   | -0.026 | -0.035 | C19   | -0.037 | -0.036 | C19   | -0.027 | -0.026 |
| C20   | -0.013 | -0.007 | C20   | 0.000  | -0.007 | C20   | 0.012  | 0.004  | O20   | -0.037 | -0.042 |
| C21   | -0.027 | -0.026 | C21   | -0.029 | -0.037 | C21   | -0.095 | -0.004 | O21   | 0.015  | 0.007  |

Table S1. *Cont.*

| SS    |        |        | AM    |        |        | AR    |        |        | TZ    |        |        |
|-------|--------|--------|-------|--------|--------|-------|--------|--------|-------|--------|--------|
| Atoms | $f^+$  | $f^-$  | Atoms | $f^+$  | $f^-$  | Atoms | $f^+$  | $f^-$  | Atoms | $f^+$  | $f^-$  |
| C22   | -0.006 | -0.008 | C22   | 0.004  | 0.004  | C22   | 0.012  | -0.044 | C22   | -0.001 | -0.003 |
| C23   | -0.028 | -0.023 | C23   | -0.015 | -0.013 | C23   | 0.004  | -0.022 | C23   | -0.002 | -0.011 |
| S24   | -0.036 | -0.023 | C24   | -0.002 | -0.018 | C24   | -0.019 | -0.018 | C24   | -0.005 | -0.291 |
| O25   | -0.027 | -0.027 | C25   | -0.010 | -0.017 | C25   | -0.006 | -0.018 | C25   | -0.013 | -0.020 |
| O26   | 0.001  | -0.021 | C26   | -0.006 | -0.012 | C26   | -0.018 | -0.021 | C26   | -0.007 | -0.008 |
| O27   | -0.025 | -0.023 | C27   | -0.010 | -0.021 | S27   | -0.024 | -0.022 | C27   | -0.002 | -0.013 |
|       |        |        | S28   | -0.029 | -0.026 | O28   | -0.008 | -0.012 | S28   | -0.020 | -0.020 |
|       |        |        | O29   | -0.006 | -0.010 | O29   | -0.017 | -0.023 | O29   | -0.024 | -0.024 |
|       |        |        | O30   | -0.020 | -0.030 | O30   | -0.018 | -0.026 | O30   | -0.006 | -0.012 |
|       |        |        | O31   | -0.021 | -0.032 |       |        |        | O31   | -0.016 | -0.022 |
